# Supplementary material
Source: PubMed Central journal article supplement (PMC4761268)
Supplement: NIHMS731933-supplement-1.pdf [file NIHMS731933-supplement-1.pdf]

**Supplemental Table. Reliability\* measures for morphologic variables.**

| Variable                            | Reliability                  |                              |
|-------------------------------------|------------------------------|------------------------------|
|                                     | Intra-reader<br>ICC (95% CI) | Inter-reader<br>ICC (95% CI) |
| <b>MORPHOLOGY</b>                   |                              |                              |
| Acetabular depth (mm)               | 0.86 (0.68-0.94)             | 0.90 (0.70-0.96)             |
| Acetabular width (mm)               | 0.98 (0.95-0.99)             | 0.92 (0.75-0.97)             |
| Acetabular depth:width              | 0.84 (0.64-0.93)             | 0.86 (0.28-0.96)             |
| AP alpha angle (°)                  | 0.75 (0.48-0.89)             | 0.63 (0.28-0.83)             |
| Minimum JSW (mm)                    | 0.98 (0.95-0.99)             | 0.95 (0.88-0.98)             |
| Extrusion index                     | 0.94 (0.80-0.98)             | 0.75 (-0.04-0.93)            |
| Femoral shaft angle (°)             | 0.98 (0.94-0.99)             | 0.98 (0.94-0.99)             |
| Gosvig ratio                        | 0.98 (0.95-0.99)             | 0.91 (0.65-0.97)             |
| Acetabular index (°)                | 0.94 (0.85-0.97)             | 0.47 (0.07-0.75)             |
| LCEA (°)                            | 0.93 (0.82-0.97)             | 0.70 (0.04-0.90)             |
| Proximal femoral angle (°)          | 0.98 (0.95-0.99)             | 0.97 (0.92-0.99)             |
| Triangular index height (mm)        | 0.99 (0.98-0.997)            | 0.97 (0.87-0.99)             |
| Crossover sign (categorical) †      | 0.67 (0.42-0.83)             | 0.64 (0.09-0.90)             |
| Deep acetabulum (categorical) †     | 0.87 (0.75-0.94)             | 0.80 (0.41-0.95)             |
| Triangular Index Sign (categorical) | 1.00 (1.00-1.00)             | 0.84 (0.64-0.93)             |
| <b>DISTANCE</b>                     |                              |                              |
| Femoral head diameter (mm)          | 0.93 (0.83-0.97)             | 0.96 (0.89-0.99)             |
| Femoral neck length (mm)            | 0.97 (0.94-0.99)             | 0.93 (0.84-0.97)             |
| Minimum neck width (mm)             | 0.99 (0.97-0.997)            | 0.99 (0.98-0.996)            |
| Interteardrop distance (mm)         | 0.99 (0.94-0.995)            | 0.97 (0.92-0.99)             |
| SI to symphysis (mm)                | 0.998 (0.996-0.999)          | 0.997 (0.99-0.999)           |
| <b>TILT</b>                         |                              |                              |
| Obturator foramen ratio             | 0.70 (0.38-0.87)             | 0.66 (0.33-0.85)             |
| SC to symphysis (mm)                | 0.98 (0.95-0.99)             | 0.996 (0.99-0.998)           |

\*One reader read all films (AEN); intra-reader reliability (AEN) was assessed on 20 films read twice 2 weeks apart, while inter-reader reliability was assessed on 20 films read by two readers (AEN/KML).

†For crossover sign and deep acetabulum only, intra-reader reliability (AEN) was assessed on 30 films read twice 4 weeks apart, and inter-reader reliability was assessed on 10 films read by two readers (AEN/JBR).
