# Supplementary material
Source: PubMed Central journal article supplement (PMC4761268)
Supplement: NIHMS731933-supplement-2.pdf [file NIHMS731933-supplement-2.pdf]

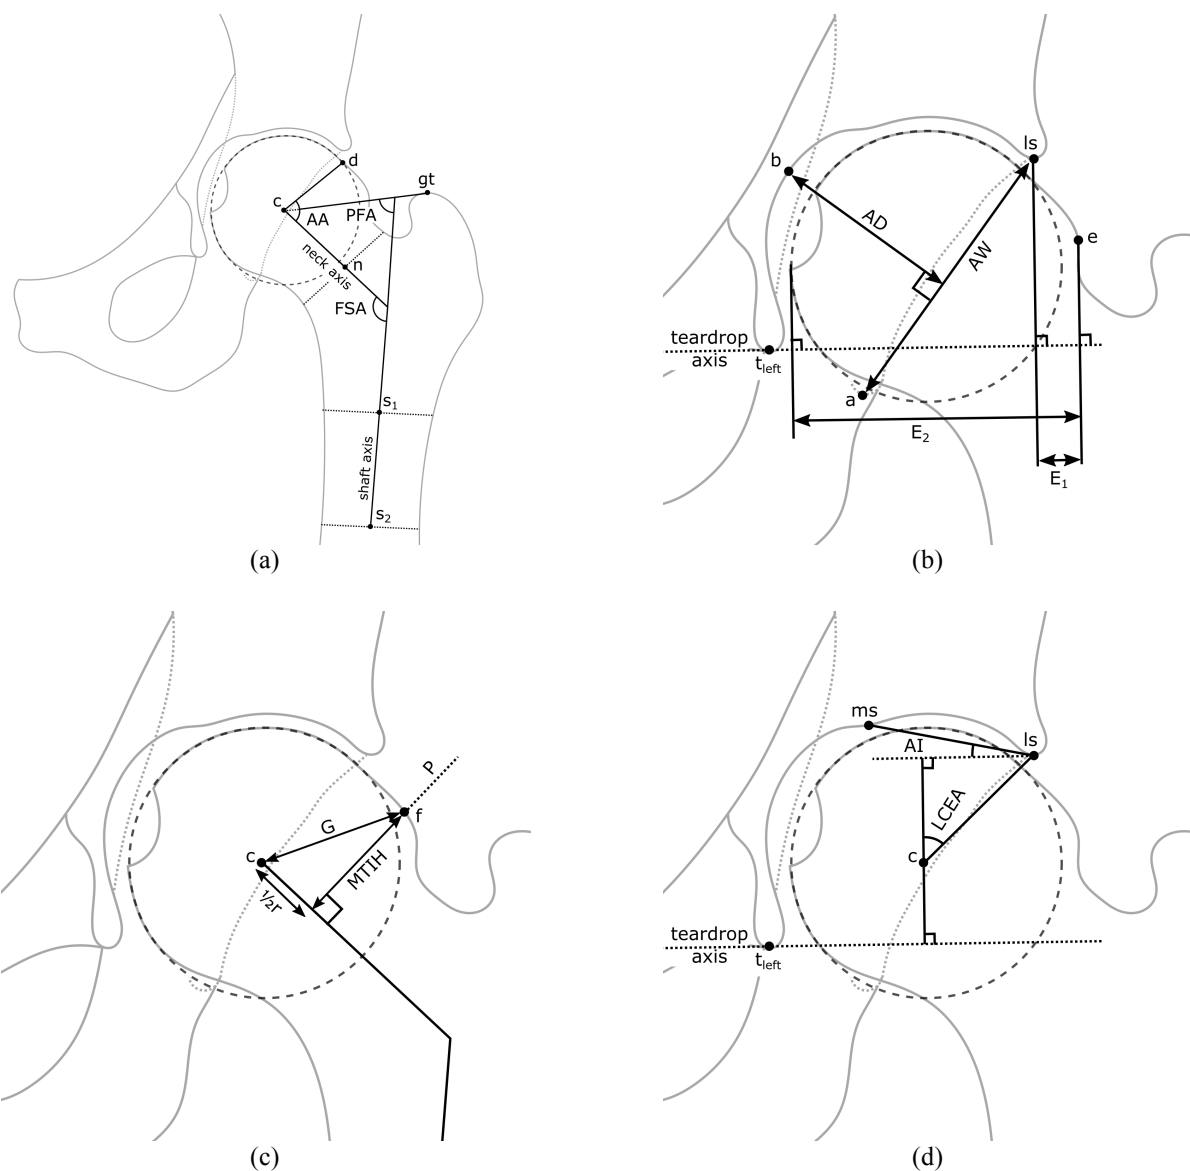

**Supplemental Figure** : Summary of important morphological measurements in OxMorf.

(a) **Femoral shaft angle (FSA)**: the angle between the neck axis and the shaft axis. The neck axis is defined by points  $c$  (centre of a circle fit to the femoral head) and  $n$  (midpoint along the line of minimum neck width). The shaft axis is defined by points  $p_1$  and  $p_2$  (respective midpoints along lines through the proximal and distal shaft). **Proximal femoral angle (PFA)**: the angle between the shaft axis and the line from points  $c$  to  $gt$  (greater trochanter). **Alpha angle (AA)**: the angle between the neck axis and the line from  $c$  to  $d$  (point of lateral deviation of the head from the circle).

(b) **Acetabular width (AW)**: the length of the line from  $ls$  (lateral sourcil) to  $a$  (inferior medial rim of the acetabulum). **Acetabular depth (AD)**: the distance from  $b$  (deepest point of acetabulum) to the closest point on the line from  $ls$  to  $a$ . **Extrusion index**: the ratio  $E_1/E_2$ .  $E_1$  is the distance along the teardrop axis from  $ls$  to  $e$  (lateral edge of the femoral head).  $E_2$  is the distance along the teardrop axis from the medial edge of the head circle to  $e$ . The teardrop axis is defined by the teardrop points  $t_{left}$  and  $t_{right}$  (not shown).

(c) **Modified triangular index height (MTIH)**: the distance from  $f$  (the point that the line  $P$  crosses the edge of the head) to the closest point on the neck axis; the line  $P$  is perpendicular to the neck axis, and crosses the axis at a distance of half the head circle radius  $r$ , from  $c$ . **Triangular index**: a binary measure, equal to 1 if  $G$  (the distance from  $c$  to  $f$ ) is greater than  $r + 2\text{mm}$ . **Gosvig ratio**. The ratio  $G/r$ .

(d) **Lateral Centre Edge Angle (LCEA)**: the angle between the line from  $c$  to  $ls$ , and a line perpendicular to the teardrop axis. **Acetabular index (AI)**: the angle between the line from  $ls$  to  $ms$  (medial sourcil) and the teardrop axis.
